# Supplementary material
Source: PubMed Central journal article supplement (PMC4265285)
Supplement: imb0023-0579-SD2.pdf [file imb0023-0579-SD2.pdf]

**Table S1. Piwi gene Identification codes.**

| Gene                        | Species                    | Strain                           | Gene ID    | Tree Identifier |
|-----------------------------|----------------------------|----------------------------------|------------|-----------------|
| Ago3                        | Anopheles stephensi        | Indian strain, Astel 2.1 geneset | ASTEI04992 | AsAgo3          |
|                             |                            | SDA-500 strain, AteS 1.0 geneset | ASTE009599 | AsAgo3          |
|                             | Anopheles gambiae          | PEST, Agamp3.7 geneset           | AGAP008862 | AgAgo3          |
|                             | Aedes aegypti              | Liverpool, AaegL 1.4 geneset     | AAEL007823 | AaeAgo3         |
|                             | Drosophila melanogaster    |                                  | 3355150    | DmAgo3          |
|                             | Anopheles albimanus        | STECLA, AalbS1.1 geneset         | AALB001790 | AA1             |
|                             | Anopheles arabiensis       | Dongola, AaraD1.1 geneset        | AARA009401 | AR2             |
|                             | Anopheles christi          | ACHKN1017, AchrA1.1 geneset      | ACHR007454 | AC2             |
|                             | Anopheles darlingi         | Coari, AdarC2.2 geneset          | ADAC008631 | AD1             |
|                             | Anopheles dirus            | WRAIR2, AdirW1.1 geneset         | ADIR009721 | AI1             |
|                             | Anopheles epiroticus       | Epiroticus2, AepiE1.1 geneset    | AEPI002451 | AP1             |
|                             | Anopheles funestus         | FUMOZ, AfunF1.1 geneset          | AFUN000985 | AF1             |
|                             | Anopheles minimus A        | MINIMUS1, AminM1.1 geneset       | AMIN001620 | AM1             |
|                             |                            |                                  | AMIN001621 | AM2             |
| Anopheles quadriannulatus A | SANGWE, AquaS1.1 geneset   | AQUA007856*<br>AQUA007857        | AQ1        |                 |
| Aubergine                   | Anopheles stephensi        | Indian strain, Astel 2.1 geneset | ASTEI03833 | AsAub           |
|                             |                            | SDA-500 strain, AteS 1.0 geneset | ASTE011384 | AsAub           |
|                             | Anopheles gambiae          | PEST, Agamp3.7 geneset           | AGAP009509 | AgAub           |
|                             | Aedes aegypti              | Liverpool, AaegL 1.4 geneset     | AAEL008076 | AaePiwi1        |
|                             |                            |                                  | AAEL008098 | AaePiwi2        |
|                             |                            |                                  | AAEL013692 | AaePiwi3        |
|                             |                            |                                  | AAEL007698 | AaePiwi4        |
|                             | Drosophila melanogaster    |                                  | 34524      | DmAub           |
|                             | Anopheles arabiensis       | Dongola, AaraD1.1 geneset        | AARA011871 | AR3             |
|                             | Anopheles christi          | ACHKN1017, AchrA1.1 geneset      | ACHR004324 | AC3             |
|                             | Anopheles darlingi         | Coari, AdarC2.2 geneset          | ADAC006051 | AD3             |
|                             | Anopheles dirus            | WRAIR2, AdirW1.1 geneset         | ADIR006020 | AI4             |
|                             | Anopheles epiroticus       | Epiroticus2, AepiE1.1 geneset    | AEPI004893 | AP3             |
|                             | Anopheles funestus         | FUMOZ, AfunF1.1 geneset          | AFUN005296 | AF3             |
| Anopheles minimus           | MINIMUS1, AminM1.1 geneset | AMIN001881                       | AM4        |                 |
| Anopheles quadriannulatus A | SANGWE, AquaS1.1 geneset   | AQUA005807                       | AQ3        |                 |
| Piwi                        | Anopheles stephensi        | Indian strain, Astel 2.1 geneset | ASTEI06803 | AsPiwi          |
|                             |                            | SDA-500 strain, AteS 1.0 geneset | ASTE008262 | AsPiwi          |
|                             | Anopheles gambiae          | PEST, Agamp3.7 geneset           | AGAP011204 | AgPiwi          |
|                             | Aedes aegypti              | Liverpool, AaegL 1.4 geneset     | AAEL013233 | AaePiwi5        |
|                             |                            |                                  | AAEL013227 | AaePiwi6        |
|                             |                            |                                  | AAEL006287 | AaePiwi7        |
|                             | Drosophila melanogaster    |                                  | 34521      | DmPiwi          |
|                             | Anopheles albimanus        | STECLA, AalbS1.1 geneset         | AALB010564 | AA2             |
|                             |                            |                                  | AALB010570 | AA3             |
|                             | Anopheles ariabiensis      | Dongola, AaraD1.1 geneset        | AARA000129 | AR1             |
|                             | Anopheles christi          | ACHKN1017, AchrA1.1 geneset      | ACHR009351 | AC1             |
|                             | Anopheles darlingi         | Coari, AdarC2.2 geneset          | ADAC008732 | AD2             |
|                             | Anopheles dirus            | WRAIR2, AdirW1.1 geneset         | ADIR000087 | AI2             |
|                             |                            |                                  | ADIR000092 | AI3             |
|                             | Anopheles epiroticus       | Epiroticus2, AepiE1.1 geneset    | AEPI006652 | AP2             |
|                             | Anopheles funestus         | FUMOZ, AfunF1.1 geneset          | AFUN004060 | AF2             |
| Anopheles minimus           | MINIMUS1, AminM1.1 geneset | AMIN008377                       | AM3        |                 |
| Anopheles quadriannulatus A | SANGWE, AquaS1.1 geneset   | AQUA005063                       | AQ2        |                 |

\*Gene model in VectorBase missassigned this ortholog as two genes.
