# Supplementary material
Source: PubMed Central journal article supplement (PMC4265285)
Supplement: imb0023-0579-SD3.pdf [file imb0023-0579-SD3.pdf]

**Table S1: p-values from statistical analysis using two-sided t-tests of tissue and time point expression as measured by qPCR.**

|      |                    |        |        |        |        | Female Carcass PBM |        |        |        |        | Female Ovaries PBM |        |        |        |        |  |
|------|--------------------|--------|--------|--------|--------|--------------------|--------|--------|--------|--------|--------------------|--------|--------|--------|--------|--|
|      |                    | Embryo | Larvae | Pupae  | Male   | 0 hr               | 2 hr   | 24 hr  | 48 hr  | 72 hr  | 0 hr               | 2 hr   | 24 hr  | 48 hr  | 72 hr  |  |
| Ago3 | Female Carcass PBM | Embryo |        |        |        |                    |        |        |        |        |                    |        |        |        |        |  |
|      |                    | Larvae | 0.0031 |        |        |                    |        |        |        |        |                    |        |        |        |        |  |
|      |                    | Pupae  | 0.5915 | 0.0988 |        |                    |        |        |        |        |                    |        |        |        |        |  |
|      |                    | Male   | 0.1256 | 0.0561 | 0.1274 |                    |        |        |        |        |                    |        |        |        |        |  |
|      |                    | 0 hr   | 0.0006 | 0.1580 | 0.0381 | 0.0472             |        |        |        |        |                    |        |        |        |        |  |
|      | Female Ovaries PBM | 2 hr   | 0.0034 | 0.7066 | 0.0954 | 0.0691             | 0.3396 |        |        |        |                    |        |        |        |        |  |
|      |                    | 24 hr  | 0.0003 | 0.0487 | 0.0270 | 0.0448             | 0.6071 | 0.1411 |        |        |                    |        |        |        |        |  |
|      |                    | 48 hr  | 0.9310 | 0.0403 | 0.5937 | 0.0411             | 0.0156 | 0.0416 | 0.0114 |        |                    |        |        |        |        |  |
|      |                    | 72 hr  | 0.0045 | 0.9389 | 0.1117 | 0.0568             | 0.1952 | 0.6896 | 0.0810 | 0.0441 |                    |        |        |        |        |  |
|      |                    | 0 hr   | 0.0130 | 0.8574 | 0.1559 | 0.0589             | 0.2992 | 0.6880 | 0.1860 | 0.0566 | 0.9061             |        |        |        |        |  |
|      |                    | 2 hr   | 0.8558 | 0.0891 | 0.8016 | 0.1222             | 0.0399 | 0.0897 | 0.0303 | 0.8047 | 0.0977             | 0.1263 |        |        |        |  |
|      |                    | 24 hr  | 0.7325 | 0.0872 | 0.5364 | 0.1672             | 0.0494 | 0.0931 | 0.0409 | 0.7608 | 0.0924             | 0.1088 | 0.6752 |        |        |  |
|      |                    | 48 hr  | 0.0023 | 0.0008 | 0.0031 | 0.1450             | 0.0006 | 0.0014 | 0.0006 | 0.0001 | 0.0008             | 0.0009 | 0.0022 | 0.0034 |        |  |
|      |                    | 72 hr  | 0.0000 | 0.0000 | 0.0000 | 0.9517             | 0.0000 | 0.0000 | 0.0000 | 0.0000 | 0.0000             | 0.0000 | 0.0001 | 0.0011 | 0.0670 |  |
| Aub  | Female Carcass PBM | Embryo |        |        |        |                    |        |        |        |        |                    |        |        |        |        |  |
|      |                    | Larvae | 0.0003 |        |        |                    |        |        |        |        |                    |        |        |        |        |  |
|      |                    | Pupae  | 0.0002 | 0.6728 |        |                    |        |        |        |        |                    |        |        |        |        |  |
|      |                    | Male   | 0.0034 | 0.6012 | 0.4092 |                    |        |        |        |        |                    |        |        |        |        |  |
|      |                    | 0 hr   | 0.0000 | 0.1562 | 0.3397 | 0.1368             |        |        |        |        |                    |        |        |        |        |  |
|      | Female Ovaries PBM | 2 hr   | 0.0001 | 0.3059 | 0.5855 | 0.2340             | 0.5657 |        |        |        |                    |        |        |        |        |  |
|      |                    | 24 hr  | 0.0000 | 0.0165 | 0.0457 | 0.0419             | 0.1027 | 0.0146 |        |        |                    |        |        |        |        |  |
|      |                    | 48 hr  | 0.0000 | 0.6404 | 0.3642 | 0.8096             | 0.0647 | 0.1524 | 0.0081 |        |                    |        |        |        |        |  |
|      |                    | 72 hr  | 0.0000 | 0.0231 | 0.0670 | 0.0458             | 0.2126 | 0.0415 | 0.4714 | 0.0102 |                    |        |        |        |        |  |
|      |                    | 0 hr   | 0.8853 | 0.1226 | 0.1000 | 0.1840             | 0.0646 | 0.0952 | 0.0536 | 0.0450 | 0.0456             |        |        |        |        |  |
|      |                    | 2 hr   | 0.5716 | 0.0537 | 0.0445 | 0.0790             | 0.0301 | 0.0469 | 0.0283 | 0.0098 | 0.0222             | 0.5828 |        |        |        |  |
|      |                    | 24 hr  | 0.4040 | 0.0351 | 0.0293 | 0.0518             | 0.0199 | 0.0321 | 0.0196 | 0.0045 | 0.0148             | 0.4399 | 0.8225 |        |        |  |
|      |                    | 48 hr  | 0.0067 | 0.0004 | 0.0003 | 0.0006             | 0.0002 | 0.0006 | 0.0003 | 0.0000 | 0.0002             | 0.0088 | 0.0313 | 0.0512 |        |  |
|      |                    | 72 hr  | 0.0030 | 0.0000 | 0.0000 | 0.0000             | 0.0000 | 0.0000 | 0.0000 | 0.0000 | 0.0000             | 0.1141 | 0.4935 | 0.7207 | 0.0549 |  |
| Piwi | Female Carcass PBM | Embryo |        |        |        |                    |        |        |        |        |                    |        |        |        |        |  |
|      |                    | Larvae | 0.0000 |        |        |                    |        |        |        |        |                    |        |        |        |        |  |
|      |                    | Pupae  | 0.0000 | 0.0818 |        |                    |        |        |        |        |                    |        |        |        |        |  |
|      |                    | Male   | N/A    | N/A    | N/A    |                    |        |        |        |        |                    |        |        |        |        |  |
|      |                    | 0 hr   | 0.0000 | 0.0304 | 0.0003 | N/A                |        |        |        |        |                    |        |        |        |        |  |
|      | Female Ovaries PBM | 2 hr   | N/A    | N/A    | N/A    | N/A                | N/A    |        |        |        |                    |        |        |        |        |  |
|      |                    | 24 hr  | 0.0000 | 0.0110 | 0.0001 | N/A                | 0.2045 | N/A    |        |        |                    |        |        |        |        |  |
|      |                    | 48 hr  | N/A    | N/A    | N/A    | N/A                | N/A    | N/A    | N/A    |        |                    |        |        |        |        |  |
|      |                    | 72 hr  | 0.0000 | 0.5909 | 0.0222 | N/A                | 0.0671 | N/A    | 0.0253 | N/A    |                    |        |        |        |        |  |
|      |                    | 0 hr   | 0.0000 | 0.7588 | 0.0885 | N/A                | 0.0023 | N/A    | 0.0005 | N/A    | 0.3449             |        |        |        |        |  |
|      |                    | 2 hr   | 0.0009 | 0.0113 | 0.0769 | N/A                | 0.0023 | N/A    | 0.0009 | N/A    | 0.0057             | 0.0126 |        |        |        |  |
|      |                    | 24 hr  | 0.0000 | 0.0110 | 0.0001 | N/A                | 0.2045 | N/A    | N/A    | N/A    | 0.0253             | 0.0005 | 0.0009 |        |        |  |
|      |                    | 48 hr  | 0.0514 | 0.0005 | 0.0007 | N/A                | 0.0012 | N/A    | 0.0005 | N/A    | 0.0004             | 0.0005 | 0.0017 | 0.0011 |        |  |
|      |                    | 72 hr  | 0.0000 | 0.0000 | 0.0000 | N/A                | 0.0000 | N/A    | 0.0000 | N/A    | 0.0000             | 0.0000 | 0.0000 | 0.0000 | 0.8410 |  |

P-values less than 0.05 and 0.001 are highlighted in light and dark orange respectively. N/A indicates little or no amplification of the target gene in one of the compared samples in technical and biological replicates, which prohibited performance of the test. This occurred for Piwi amplified from male samples and female carcass samples.
