# Supplementary material
Source: PubMed Central journal article supplement (PMC4265285)
Supplement: imb0023-0579-SD4.pdf [file imb0023-0579-SD4.pdf]

**Table S3. List of primers.**

| Primers                               | 5'-3' Forward             | 5'-3' Reverse            |
|---------------------------------------|---------------------------|--------------------------|
| <b>5' RACE</b>                        |                           |                          |
| Ago3                                  | CGCGCGCACACTCGCCAACG      | CGGCCACCCCGTCGCGGAAT     |
| Ago3 Rev 2                            |                           | TGCGGGTGCAGCGCCTGA       |
| Ago3 Rev 2                            |                           | GCTGCGGCACGATGCGGGCCTGT  |
| Aub                                   | TGGCACGCGGCTTCAGGGGGA     | CGGGCTGGGACACGCCGGGA     |
| Aub Rev 1                             |                           | CGGGCTGGGACACGCCGGGACA   |
| Aub Rev 2                             |                           | TGCGCCATGCCGGGCGACGCT    |
| Piwi                                  | CCGCCCGGTCTGGTAATCCGATGC  | ATGACGGGGCCCTGCGTGCGG    |
| Piwi Rev 1                            |                           | TGCGCCGGTATCGCCGCTCCGT   |
| Piwi Rev 2                            |                           | GCTGGGGCGCGGCAGAATGCGGT  |
| <b>3' RACE</b>                        |                           |                          |
| Ago3                                  | TACTCGCGGGCCACGATCCA      | CCGGCACACGAATGGTCCCC     |
| Aub                                   | GCCGCCCGTGGCATGCGGTT      | GCCACCGCTGCGATACACACCCCG |
| Aub For1                              | TGCAAGCTCGGCGGCGTACCGT    |                          |
| Aub For 2                             | CGGCCGGCATCGAGCAGGAGGTGC  |                          |
| Aub For 4                             | GCAACATGCTCGAAAAGAACTTACT |                          |
| Piwi                                  | ACCGCACACGCGGGGCGAAGA     | ACTGGGCGGTGAGGAAGGCCAGC  |
| Piwi For 1                            | GGCGATGGGCAGCTGCGCGGTGT   |                          |
| Piwi For 2                            | ACCGCAATCCGCCGCCCGGCAC    |                          |
| <b>Quantitative PCR</b>               |                           |                          |
| Ago3                                  | AGCGTGCTCGATCATACCGT      | CGTCCCGCAGCACAATGTAG     |
| Aub                                   | CCGGGCTGACGGATTCAATG      | CGATCCGGATTGAGACGGGT     |
| Piwi                                  | GGTTCAAATCGGTGCCGCTG      | CATTCACGTACGCGTTGCCT     |
| rpS7                                  | GGTGACCTGGATAAGAACCA      | CGGCCAGTCAGTTCTTGTAC     |
| <b>Determination of cDNA sequence</b> |                           |                          |
| Ago3 1                                | CCTCTGCCAACCGGGACAGT      | CACCATTGCTCCTGCGAGA      |
| Ago3 2                                | TGTTCCGGCGCGTCATGTAT      | GTTGGCAACCTTGCCTCCT      |
| Ago3 3                                | ACAAGGAAACGCCGAGGAG       | GTTGGCAACCTTGCCTCCT      |
| Ago3 4                                | GGCGATCAAACGGCTGCTCT      | AGCCGGAGCATTCCCTAGCC     |
| Aub 1                                 | GGAGGTTATCCACCGCAAGG      | ACAGAAGCGGTTGCCAGTC      |
| Aub 2                                 | GACCCCTGGCGGATACACTG      | TACGATCGTGCCGCTGACAT     |
| Aub 3                                 | GGCAGCACGAAAACGATGTG      | TCGACGAGACGACGATCGAG     |
| Aub 4                                 | GGAGCTCGATCGTCTGCTCG      | ATCGCACCGAACGATTTGCT     |
| Aub 5                                 | AAATCGTTCCGGTGCATGGT      | TCGTGCCGGACCAATTGTAG     |
| Piwi 1A                               | GGCAACACAGCTTGCGAAGA      | GCTTGTGGGTTTGCATCTGCT    |
| Piwi 1B                               | GCTGCTGGGTGCGATTCTTT      | GCTTGTGGGTTTGCATCTGCT    |
| Piwi 2                                | GCAGCAGATGCAAACCCACA      | GGATCAGTGCTGCATGACG      |
| Piwi 3                                | TTGAGCCAACGGTGGAGGAT      | GACGAACCGTCCTTCGTGCT     |
| Piwi 4                                | CAGGTCTCGGTGCACAGGT       | AGCGGCACCGATTTGAACAT     |
| Piwi 5                                | GCACCGGAACAGATGTTCA       | TGCTTCGACGCGTACATGGT     |
| Piwi 6                                | CGAAGCAGACCGAACCGAAG      | GTCCGCCGTGAGACCACTCT     |
